# Supplementary material
Source: publisher figshare collection journal article supplement (https://acs.figshare.com/ndownloader/files/3964012)
Supplement: Supplementary file 1 [file 3964012]

data_2f4me

_audit_creation_method            SHELXL-97
_chemical_name_systematic
;
 ?
;
_chemical_name_common             ?
_chemical_melting_point           ?
_chemical_formula_moiety          ?
_chemical_formula_sum
 'C16.50 H16 F0.50 N0.50 Ni0.50 O3 S5'
_chemical_formula_weight          468.45

loop_
 _atom_type_symbol
 _atom_type_description
 _atom_type_scat_dispersion_real
 _atom_type_scat_dispersion_imag
 _atom_type_scat_source
 'C'  'C'   0.0033   0.0016
 'International Tables Vol C Tables 4.2.6.8 and 6.1.1.4'
 'H'  'H'   0.0000   0.0000
 'International Tables Vol C Tables 4.2.6.8 and 6.1.1.4'
 'N'  'N'   0.0061   0.0033
 'International Tables Vol C Tables 4.2.6.8 and 6.1.1.4'
 'O'  'O'   0.0106   0.0060
 'International Tables Vol C Tables 4.2.6.8 and 6.1.1.4'
 'F'  'F'   0.0171   0.0103
 'International Tables Vol C Tables 4.2.6.8 and 6.1.1.4'
 'S'  'S'   0.1246   0.1234
 'International Tables Vol C Tables 4.2.6.8 and 6.1.1.4'
 'Ni'  'Ni'   0.3393   1.1124
 'International Tables Vol C Tables 4.2.6.8 and 6.1.1.4'

_symmetry_cell_setting            monoclinic
_symmetry_space_group_name_H-M    'C 2/c'

loop_
 _symmetry_equiv_pos_as_xyz
 'x, y, z'
 '-x, y, -z+1/2'
 'x+1/2, y+1/2, z'
 '-x+1/2, y+1/2, -z+1/2'
 '-x, -y, -z'
 'x, -y, z-1/2'
 '-x+1/2, -y+1/2, -z'
 'x+1/2, -y+1/2, z-1/2'

_cell_length_a                    29.103(2)
_cell_length_b                    9.1316(5)
_cell_length_c                    20.2030(13)
_cell_angle_alpha                 90.00
_cell_angle_beta                  131.7296(17)
_cell_angle_gamma                 90.00
_cell_volume                      4006.9(5)
_cell_formula_units_Z             8
_cell_measurement_temperature     296(2)
_cell_measurement_reflns_used     ?
_cell_measurement_theta_min       ?
_cell_measurement_theta_max       ?

_exptl_crystal_description        ?
_exptl_crystal_colour             ?
_exptl_crystal_size_max           0.40
_exptl_crystal_size_mid           0.22
_exptl_crystal_size_min           0.10
_exptl_crystal_density_meas       ?
_exptl_crystal_density_diffrn     1.553
_exptl_crystal_density_method     'not measured'
_exptl_crystal_F_000              1928
_exptl_absorpt_coefficient_mu     1.054
_exptl_absorpt_correction_type    ?
_exptl_absorpt_correction_T_min   0.6779
_exptl_absorpt_correction_T_max   0.9019
_exptl_absorpt_process_details    ?

_exptl_special_details
;
 ?
;

_diffrn_ambient_temperature       296(2)
_diffrn_radiation_wavelength      0.71075
_diffrn_radiation_type            MoK\a
_diffrn_radiation_source          'fine-focus sealed tube'
_diffrn_radiation_monochromator   graphite
_diffrn_measurement_device_type   ?
_diffrn_measurement_method        ?
_diffrn_detector_area_resol_mean  ?
_diffrn_standards_number          ?
_diffrn_standards_interval_count  ?
_diffrn_standards_interval_time   ?
_diffrn_standards_decay_%         ?
_diffrn_reflns_number             19041
_diffrn_reflns_av_R_equivalents   0.0682
_diffrn_reflns_av_sigmaI/netI     0.0576
_diffrn_reflns_limit_h_min        -37
_diffrn_reflns_limit_h_max        37
_diffrn_reflns_limit_k_min        -11
_diffrn_reflns_limit_k_max        11
_diffrn_reflns_limit_l_min        -26
_diffrn_reflns_limit_l_max        26
_diffrn_reflns_theta_min          3.06
_diffrn_reflns_theta_max          27.44
_reflns_number_total              4567
_reflns_number_gt                 2491
_reflns_threshold_expression      >2sigma(I)

_computing_data_collection        ?
_computing_cell_refinement        ?
_computing_data_reduction         ?
_computing_structure_solution     'SHELXS-97 (Sheldrick, 1990)'
_computing_structure_refinement   'SHELXL-97 (Sheldrick, 1997)'
_computing_molecular_graphics 'Yadokari-XG 2009 (Wakita Nemoto et al., 2009)'
_computing_publication_material
;Yadokari-XG 2009 (Wakita,Nemoto et al., 2009)
;

_refine_special_details
;
 Refinement of F^2^ against ALL reflections.  The weighted R-factor wR and
 goodness of fit S are based on F^2^, conventional R-factors R are based
 on F, with F set to zero for negative F^2^. The threshold expression of
 F^2^ > 2sigma(F^2^) is used only for calculating R-factors(gt) etc. and is
 not relevant to the choice of reflections for refinement.  R-factors based
 on F^2^ are statistically about twice as large as those based on F, and R-
 factors based on ALL data will be even larger.
;

_refine_ls_structure_factor_coef  Fsqd
_refine_ls_matrix_type            full
_refine_ls_weighting_scheme       calc
_refine_ls_weighting_details
 'calc w=1/[\s^2^(Fo^2^)+(0.0604P)^2^+7.2608P] where P=(Fo^2^+2Fc^2^)/3'
_atom_sites_solution_primary      direct
_atom_sites_solution_secondary    difmap
_atom_sites_solution_hydrogens    geom
_refine_ls_hydrogen_treatment     mixed
_refine_ls_extinction_method      none
_refine_ls_extinction_coef        ?
_refine_ls_number_reflns          4567
_refine_ls_number_parameters      245
_refine_ls_number_restraints      0
_refine_ls_R_factor_all           0.1081
_refine_ls_R_factor_gt            0.0464
_refine_ls_wR_factor_ref          0.1568
_refine_ls_wR_factor_gt           0.1049
_refine_ls_goodness_of_fit_ref    1.060
_refine_ls_restrained_S_all       1.060
_refine_ls_shift/su_max           0.000
_refine_ls_shift/su_mean          0.000

loop_
 _atom_site_label
 _atom_site_type_symbol
 _atom_site_fract_x
 _atom_site_fract_y
 _atom_site_fract_z
 _atom_site_U_iso_or_equiv
 _atom_site_adp_type
 _atom_site_occupancy
 _atom_site_symmetry_multiplicity
 _atom_site_calc_flag
 _atom_site_refinement_flags
 _atom_site_disorder_assembly
 _atom_site_disorder_group
S1 S 0.31155(6) -0.13293(16) 0.88855(10) 0.0796(5) Uani 1 1 d . . .
S2 S 0.21748(5) 0.03918(14) 0.72410(8) 0.0589(3) Uani 1 1 d . . .
S3 S 0.08552(5) 0.10424(13) 0.55489(8) 0.0532(3) Uani 1 1 d . . .
S4 S -0.04382(5) 0.15187(13) 0.39055(8) 0.0556(3) Uani 1 1 d . . .
S5 S -0.17827(6) 0.20053(14) 0.22948(9) 0.0649(4) Uani 1 1 d . . .
O1 O -0.01970(17) -0.3468(3) 0.3609(2) 0.0620(9) Uani 1 1 d . . .
O2 O 0.10093(17) -0.3176(4) 0.4282(2) 0.0640(9) Uani 1 1 d . . .
O3 O 0.12152(17) -0.3240(3) 0.3201(2) 0.0633(9) Uani 1 1 d . . .
C1 C 0.1381(2) 0.0056(5) 0.6506(3) 0.0493(10) Uani 1 1 d . . .
C2 C -0.1203(2) 0.1066(5) 0.3262(3) 0.0526(11) Uani 1 1 d . . .
C3 C 0.0000 0.4029(6) 0.2500 0.0464(14) Uani 1 2 d S . .
C4 C 0.2397(2) -0.0989(5) 0.7993(3) 0.0594(12) Uani 1 1 d . . .
C5 C 0.0533(2) 0.1750(5) 0.3127(3) 0.0647(14) Uani 1 1 d . . .
H1 H 0.0897 0.1241 0.3554 0.078 Uiso 1 1 calc R . .
C6 C 0.0000 0.0999(7) 0.2500 0.0595(18) Uani 1 2 d S . .
C7 C 0.1555(2) -0.2236(5) 0.3886(3) 0.0601(12) Uani 1 1 d . . .
C8 C 0.0857(3) -0.3064(6) 0.4828(3) 0.0660(14) Uani 1 1 d . . .
H2 H 0.0754 -0.2060 0.4838 0.079 Uiso 1 1 calc R . .
H3 H 0.1207 -0.3356 0.5431 0.079 Uiso 1 1 calc R . .
C9 C 0.0322(3) -0.4042(6) 0.4453(3) 0.0674(14) Uani 1 1 d . . .
H4 H 0.0410 -0.5030 0.4388 0.081 Uiso 1 1 calc R . .
H5 H 0.0239 -0.4071 0.4845 0.081 Uiso 1 1 calc R . .
C10 C 0.1265(3) -0.3180(6) 0.2541(3) 0.0710(15) Uani 1 1 d . . .
H6 H 0.1667 -0.3532 0.2789 0.085 Uiso 1 1 calc R . .
H7 H 0.1220 -0.2177 0.2348 0.085 Uiso 1 1 calc R . .
C11 C 0.1444(2) -0.2202(5) 0.4464(3) 0.0597(12) Uani 1 1 d . . .
C12 C 0.1760(3) -0.1213(6) 0.5153(4) 0.0753(16) Uani 1 1 d . . .
H8 H 0.1692 -0.1193 0.5543 0.090 Uiso 1 1 calc R . .
C13 C 0.0534(2) 0.3278(5) 0.3130(3) 0.0599(13) Uani 1 1 d . . .
C14 C -0.0774(3) -0.4109(6) 0.3226(3) 0.0677(14) Uani 1 1 d . . .
H9 H -0.0820 -0.4147 0.3659 0.081 Uiso 1 1 calc R . .
H10 H -0.0800 -0.5099 0.3030 0.081 Uiso 1 1 calc R . .
C15 C 0.2176(3) -0.0248(7) 0.5272(4) 0.0849(18) Uani 1 1 d . . .
H11 H 0.2380 0.0427 0.5734 0.102 Uiso 1 1 calc R . .
C16 C 0.1979(3) -0.1290(6) 0.4023(4) 0.0739(15) Uani 1 1 d . . .
H12 H 0.2060 -0.1325 0.3648 0.089 Uiso 1 1 calc R . .
C17 C 0.0000 -0.0674(8) 0.2500 0.101(3) Uani 1 2 d S . .
H13 H -0.0222 -0.1024 0.2666 0.152 Uiso 0.50 1 calc PR . .
H14 H 0.0416 -0.1024 0.2917 0.152 Uiso 0.50 1 calc PR . .
H15 H -0.0194 -0.1024 0.1917 0.152 Uiso 0.50 1 calc PR . .
C18 C 0.2289(3) -0.0282(6) 0.4715(4) 0.0820(17) Uani 1 1 d . . .
H16 H 0.2571 0.0363 0.4798 0.098 Uiso 1 1 calc R . .
Ni1 Ni 0.0000 0.0000 0.5000 0.0466(2) Uani 1 2 d S . .
N1 N 0.0000 0.5639(5) 0.2500 0.0676(17) Uani 1 2 d S . .
H1A H -0.0368 0.5964 0.2272 0.101 Uiso 0.50 1 calc PR . .
H1B H 0.0083 0.5964 0.2174 0.101 Uiso 0.50 1 calc PR . .
H1C H 0.0285 0.5964 0.3054 0.101 Uiso 0.50 1 calc PR . .
F1 F 0.1082(3) 0.3861(6) 0.3751(4) 0.0823(19) Uani 0.50 1 d P . .

loop_
 _atom_site_aniso_label
 _atom_site_aniso_U_11
 _atom_site_aniso_U_22
 _atom_site_aniso_U_33
 _atom_site_aniso_U_23
 _atom_site_aniso_U_13
 _atom_site_aniso_U_12
S1 0.0417(7) 0.0771(9) 0.0741(9) -0.0005(7) 0.0193(7) 0.0074(6)
S2 0.0368(6) 0.0663(7) 0.0600(7) -0.0054(6) 0.0266(6) -0.0038(5)
S3 0.0375(6) 0.0560(7) 0.0564(7) 0.0018(5) 0.0272(6) -0.0042(5)
S4 0.0389(6) 0.0602(7) 0.0583(7) 0.0045(6) 0.0284(6) -0.0025(5)
S5 0.0456(7) 0.0609(7) 0.0638(8) 0.0077(6) 0.0261(6) 0.0043(6)
O1 0.078(3) 0.0577(19) 0.064(2) 0.0087(16) 0.053(2) 0.0011(17)
O2 0.082(3) 0.063(2) 0.066(2) -0.0013(17) 0.057(2) 0.0025(18)
O3 0.083(3) 0.062(2) 0.061(2) -0.0017(17) 0.055(2) 0.0000(18)
C1 0.037(2) 0.055(3) 0.051(2) -0.004(2) 0.027(2) -0.002(2)
C2 0.042(3) 0.057(3) 0.049(2) -0.005(2) 0.026(2) 0.001(2)
C3 0.062(4) 0.031(3) 0.049(3) 0.000 0.038(3) 0.000
C4 0.046(3) 0.055(3) 0.068(3) -0.003(2) 0.034(3) 0.007(2)
C5 0.057(3) 0.049(3) 0.066(3) 0.007(2) 0.032(3) 0.007(2)
C6 0.075(5) 0.036(3) 0.069(4) 0.000 0.048(4) 0.000
C7 0.062(3) 0.061(3) 0.056(3) 0.002(2) 0.039(3) 0.008(2)
C8 0.087(4) 0.072(3) 0.054(3) 0.002(3) 0.053(3) 0.008(3)
C9 0.094(4) 0.060(3) 0.062(3) 0.009(3) 0.057(3) 0.004(3)
C10 0.089(4) 0.082(4) 0.071(3) -0.007(3) 0.066(3) -0.002(3)
C11 0.064(3) 0.062(3) 0.057(3) 0.006(2) 0.042(3) 0.011(2)
C12 0.079(4) 0.081(4) 0.069(3) -0.012(3) 0.051(3) 0.001(3)
C13 0.059(3) 0.053(3) 0.058(3) -0.004(2) 0.035(3) -0.007(2)
C14 0.089(4) 0.069(3) 0.071(3) 0.005(3) 0.064(3) -0.004(3)
C15 0.081(4) 0.088(4) 0.078(4) -0.019(3) 0.049(4) -0.006(3)
C16 0.073(4) 0.081(4) 0.074(4) -0.001(3) 0.051(3) -0.002(3)
C17 0.114(8) 0.035(4) 0.131(8) 0.000 0.072(7) 0.000
C18 0.074(4) 0.079(4) 0.078(4) -0.007(3) 0.044(4) -0.009(3)
Ni1 0.0342(4) 0.0499(5) 0.0511(5) -0.0016(4) 0.0265(4) -0.0009(3)
N1 0.114(5) 0.038(3) 0.080(4) 0.000 0.077(4) 0.000
F1 0.063(4) 0.047(3) 0.083(4) -0.007(3) 0.026(3) -0.012(3)

_geom_special_details
;
 All esds (except the esd in the dihedral angle between two l.s. planes)
 are estimated using the full covariance matrix.  The cell esds are taken
 into account individually in the estimation of esds in distances, angles
 and torsion angles; correlations between esds in cell parameters are only
 used when they are defined by crystal symmetry.  An approximate (isotropic)
 treatment of cell esds is used for estimating esds involving l.s. planes.
;

loop_
 _geom_bond_atom_site_label_1
 _geom_bond_atom_site_label_2
 _geom_bond_distance
 _geom_bond_site_symmetry_2
 _geom_bond_publ_flag
S1 C4 1.644(5) . ?
S2 C4 1.734(5) . ?
S2 C1 1.752(4) . ?
S3 C1 1.718(5) . ?
S3 Ni1 2.1578(11) . ?
S4 C2 1.722(5) . ?
S4 Ni1 2.1646(12) . ?
S5 C2 1.735(5) . ?
S5 C4 1.736(5) 5_556 ?
O1 C9 1.426(6) . ?
O1 C14 1.426(6) . ?
O2 C11 1.381(6) . ?
O2 C8 1.440(5) . ?
O3 C7 1.383(6) . ?
O3 C10 1.436(6) . ?
C1 C2 1.364(6) 5_556 ?
C2 C1 1.364(6) 5_556 ?
C3 C13 1.368(6) 2 ?
C3 C13 1.368(6) . ?
C3 N1 1.470(7) . ?
C4 S5 1.736(5) 5_556 ?
C5 C6 1.366(6) . ?
C5 C13 1.395(6) . ?
C6 C5 1.366(6) 2 ?
C6 C17 1.528(9) . ?
C7 C16 1.376(7) . ?
C7 C11 1.403(7) . ?
C8 C9 1.493(7) . ?
C10 C14 1.489(7) 2 ?
C11 C12 1.377(7) . ?
C12 C15 1.384(8) . ?
C13 F1 1.318(7) . ?
C14 C10 1.489(7) 2 ?
C15 C18 1.368(8) . ?
C16 C18 1.392(8) . ?
Ni1 S3 2.1578(11) 5_556 ?
Ni1 S4 2.1646(12) 5_556 ?

loop_
 _geom_angle_atom_site_label_1
 _geom_angle_atom_site_label_2
 _geom_angle_atom_site_label_3
 _geom_angle
 _geom_angle_site_symmetry_1
 _geom_angle_site_symmetry_3
 _geom_angle_publ_flag
C4 S2 C1 97.4(2) . . ?
C1 S3 Ni1 101.89(15) . . ?
C2 S4 Ni1 101.75(17) . . ?
C2 S5 C4 97.2(2) . 5_556 ?
C9 O1 C14 115.1(4) . . ?
C11 O2 C8 116.4(4) . . ?
C7 O3 C10 117.2(4) . . ?
C2 C1 S3 121.5(3) 5_556 . ?
C2 C1 S2 115.3(3) 5_556 . ?
S3 C1 S2 123.1(3) . . ?
C1 C2 S4 121.1(4) 5_556 . ?
C1 C2 S5 116.9(4) 5_556 . ?
S4 C2 S5 122.0(3) . . ?
C13 C3 C13 119.9(6) 2 . ?
C13 C3 N1 120.1(3) 2 . ?
C13 C3 N1 120.1(3) . . ?
S1 C4 S2 124.0(3) . . ?
S1 C4 S5 122.7(3) . 5_556 ?
S2 C4 S5 113.3(3) . 5_556 ?
C6 C5 C13 120.2(5) . . ?
C5 C6 C5 119.8(6) . 2 ?
C5 C6 C17 120.1(3) . . ?
C5 C6 C17 120.1(3) 2 . ?
C16 C7 O3 124.4(5) . . ?
C16 C7 C11 119.5(5) . . ?
O3 C7 C11 116.1(5) . . ?
O2 C8 C9 108.5(4) . . ?
O1 C9 C8 107.7(4) . . ?
O3 C10 C14 108.9(4) . 2 ?
C12 C11 O2 124.6(5) . . ?
C12 C11 C7 119.2(5) . . ?
O2 C11 C7 116.2(4) . . ?
C11 C12 C15 120.7(6) . . ?
F1 C13 C3 126.1(5) . . ?
F1 C13 C5 113.9(5) . . ?
C3 C13 C5 120.0(5) . . ?
O1 C14 C10 107.4(4) . 2 ?
C18 C15 C12 120.4(6) . . ?
C7 C16 C18 120.7(6) . . ?
C15 C18 C16 119.5(6) . . ?
S3 Ni1 S3 180.00(5) . 5_556 ?
S3 Ni1 S4 86.34(4) . . ?
S3 Ni1 S4 93.66(4) 5_556 . ?
S3 Ni1 S4 93.66(4) . 5_556 ?
S3 Ni1 S4 86.34(4) 5_556 5_556 ?
S4 Ni1 S4 180.0 . 5_556 ?

loop_
 _geom_torsion_atom_site_label_1
 _geom_torsion_atom_site_label_2
 _geom_torsion_atom_site_label_3
 _geom_torsion_atom_site_label_4
 _geom_torsion
 _geom_torsion_site_symmetry_1
 _geom_torsion_site_symmetry_2
 _geom_torsion_site_symmetry_3
 _geom_torsion_site_symmetry_4
 _geom_torsion_publ_flag
Ni1 S3 C1 C2 0.0(4) . . . 5_556 ?
Ni1 S3 C1 S2 179.1(2) . . . . ?
C4 S2 C1 C2 0.6(4) . . . 5_556 ?
C4 S2 C1 S3 -178.6(3) . . . . ?
Ni1 S4 C2 C1 -2.6(4) . . . 5_556 ?
Ni1 S4 C2 S5 177.5(2) . . . . ?
C4 S5 C2 C1 -0.7(4) 5_556 . . 5_556 ?
C4 S5 C2 S4 179.2(3) 5_556 . . . ?
C1 S2 C4 S1 179.3(3) . . . . ?
C1 S2 C4 S5 -0.1(3) . . . 5_556 ?
C13 C5 C6 C5 0.2(4) . . . 2 ?
C13 C5 C6 C17 -179.8(4) . . . . ?
C10 O3 C7 C16 -6.7(7) . . . . ?
C10 O3 C7 C11 172.8(4) . . . . ?
C11 O2 C8 C9 171.9(4) . . . . ?
C14 O1 C9 C8 -169.1(4) . . . . ?
O2 C8 C9 O1 -66.1(5) . . . . ?
C7 O3 C10 C14 -168.1(4) . . . 2 ?
C8 O2 C11 C12 4.0(7) . . . . ?
C8 O2 C11 C7 -175.1(4) . . . . ?
C16 C7 C11 C12 0.4(8) . . . . ?
O3 C7 C11 C12 -179.0(4) . . . . ?
C16 C7 C11 O2 179.6(4) . . . . ?
O3 C7 C11 O2 0.1(6) . . . . ?
O2 C11 C12 C15 -178.2(5) . . . . ?
C7 C11 C12 C15 0.9(8) . . . . ?
C13 C3 C13 F1 177.3(7) 2 . . . ?
N1 C3 C13 F1 -2.7(7) . . . . ?
C13 C3 C13 C5 0.2(4) 2 . . . ?
N1 C3 C13 C5 -179.8(4) . . . . ?
C6 C5 C13 F1 -177.8(5) . . . . ?
C6 C5 C13 C3 -0.3(7) . . . . ?
C9 O1 C14 C10 168.3(4) . . . 2 ?
C11 C12 C15 C18 -1.3(9) . . . . ?
O3 C7 C16 C18 178.1(5) . . . . ?
C11 C7 C16 C18 -1.3(8) . . . . ?
C12 C15 C18 C16 0.4(9) . . . . ?
C7 C16 C18 C15 0.9(9) . . . . ?
C1 S3 Ni1 S3 -167(10) . . . 5_556 ?
C1 S3 Ni1 S4 -178.71(16) . . . . ?
C1 S3 Ni1 S4 1.29(16) . . . 5_556 ?
C2 S4 Ni1 S3 -178.02(16) . . . . ?
C2 S4 Ni1 S3 1.98(16) . . . 5_556 ?
C2 S4 Ni1 S4 145.6(2) . . . 5_556 ?

_diffrn_measured_fraction_theta_max    0.997
_diffrn_reflns_theta_full              27.44
_diffrn_measured_fraction_theta_full   0.997
_refine_diff_density_max    0.616
_refine_diff_density_min   -1.002
_refine_diff_density_rms    0.094
_publ_section_references
;Wakita, K. (2001). Yadokari-XG. Software for Crystal Structure Analyses. \nRele
;
_chemical_absolute_configuration  ?
